# Supplementary material for: The main factor to improve the performance of CoSe2 for photocatalytic CO2 reduction: element doping or phase transformation
Source: Royal Society of Chemistry journal article supplement (doi:10.1039/c9ta11595a), 2020-01-01
Supplement: c9ta11595a1.pdf [file c9ta11595a1.pdf]

**Electronic Supplementary Information (ESI)**

**The main factor to improve the performance of CoSe<sub>2</sub> for photocatalytic CO<sub>2</sub> reduction: element doping or phase transformation**

Yong Xu,<sup>ab</sup> Jiang Mo,<sup>a</sup> Guanqun Xie,<sup>a</sup> Xiaoxia Wang,<sup>\*a</sup> and Shujiang Ding<sup>\*b</sup>

*<sup>a</sup>School of Materials Science and Engineering, Dongguan University of Technology, Dongguan 523808, China.*

*<sup>b</sup>Department of Applied Chemistry, School of Science, Xi'an Jiaotong University, Xi'an, 710049, P.R. China*

**\*Corresponding Author**

E-mail: wangxx@dgut.edu.cn; dingsj@mail.xjtu.edu.cn

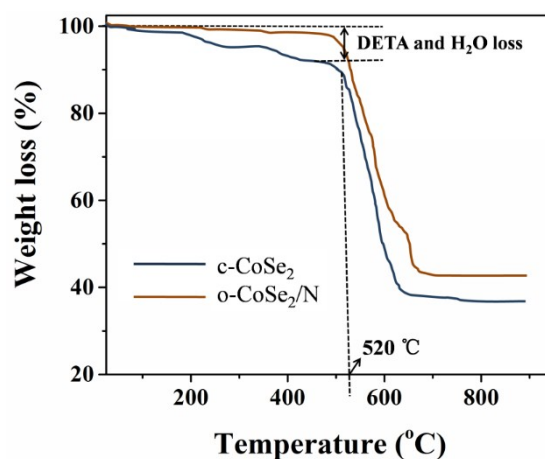

**Fig. S1.** TGA curves of c-CoSe<sub>2</sub> and o-CoSe<sub>2</sub>/N. The experimental conditions are as follows: the heating rate of 10 °C/min under N<sub>2</sub> flow.

The TGA curve of c-CoSe<sub>2</sub> shows distinct three steps of weight loss. 4.6 wt% of c-CoSe<sub>2</sub> was lost from room temperature to 280 °C, which was mainly due to the evaporation of adsorbed water and free DETA. The second stage of weight loss was brought about by the decomposition of DETA intercalated in the nanosheet structure, where 4.4 wt% weight was lost between 330 °C and 480 °C. After that, the weight of c-CoSe<sub>2</sub> began to drop rapidly because of the thermal decomposition of the sample. However, the weight of o-CoSe<sub>2</sub>/N declined slowly before 500 °C and it may be caused by the removal of water and DETA in o-CoSe<sub>2</sub>/N during the process of phase change.

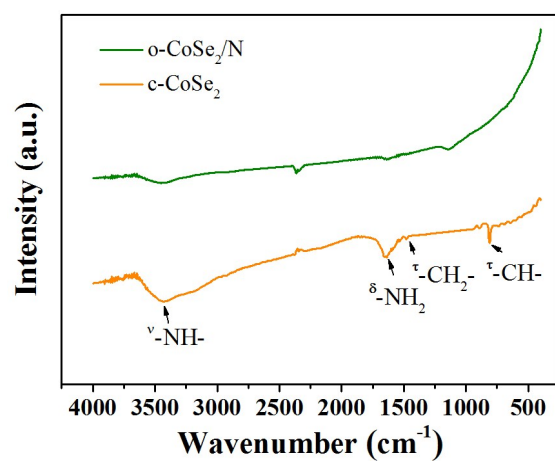

**Fig. S2.** FTIR spectra of of c-CoSe<sub>2</sub> and o-CoSe<sub>2</sub>/N.

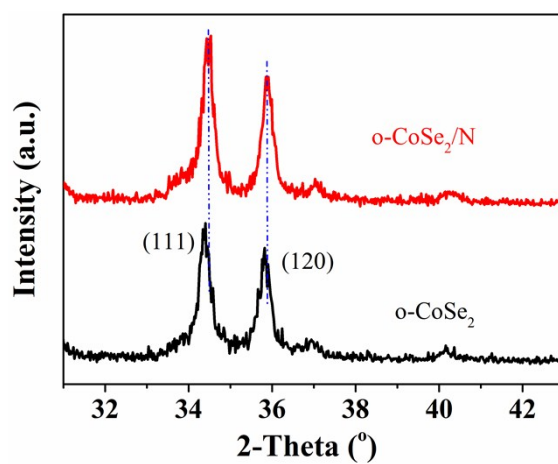

**Fig. S3.** The comparison of (111) and (120) diffraction peaks between o-CoSe<sub>2</sub>/N and pristine o-CoSe<sub>2</sub> in selected XRD patterns.

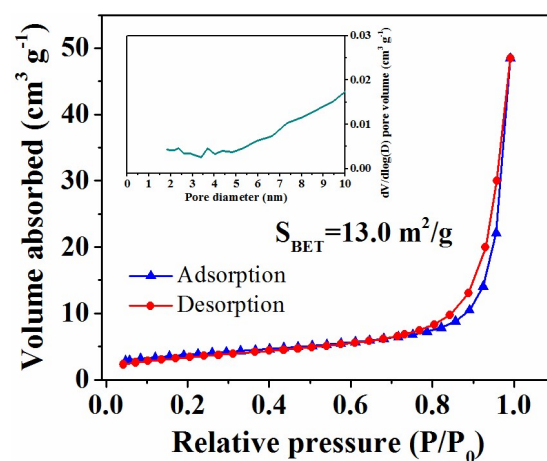

**Fig. S4.** N<sub>2</sub> adsorption-desorption isotherms of c-CoSe<sub>2</sub> along with corresponding pore size distribution.

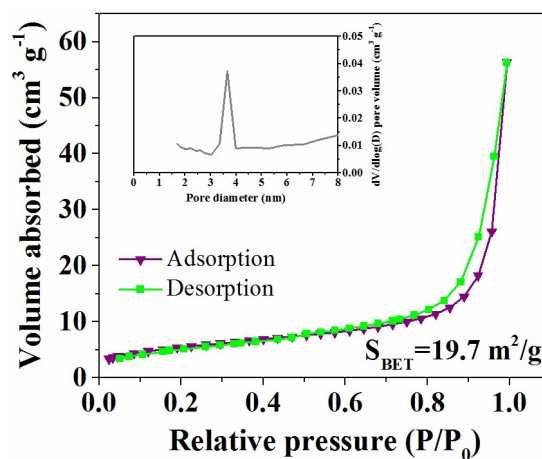

**Fig. S5.** N<sub>2</sub> adsorption-desorption isotherms of o-CoSe<sub>2</sub>/N along with corresponding pore size distribution.

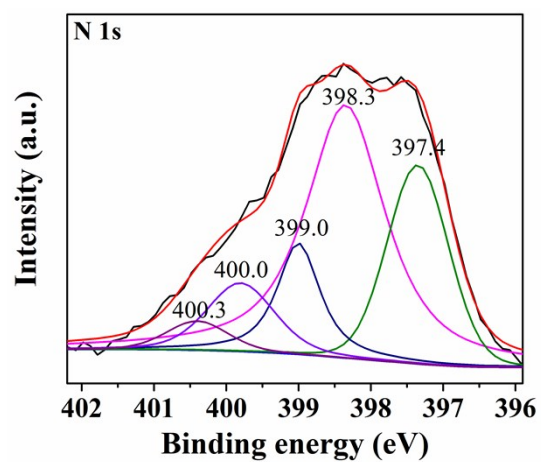

**Fig. S6.** High resolution XPS of N 1s for o-CoSe<sub>2</sub>/N.

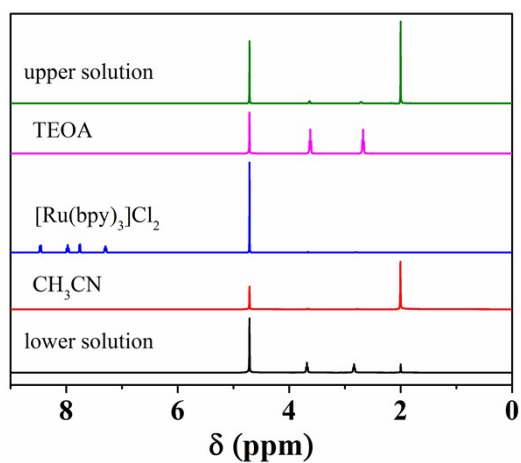

**Fig. S7.** <sup>1</sup>H NMR spectra of TEOA, photosensitizer, CH<sub>3</sub>CN and liquid phase substances after photoreaction.

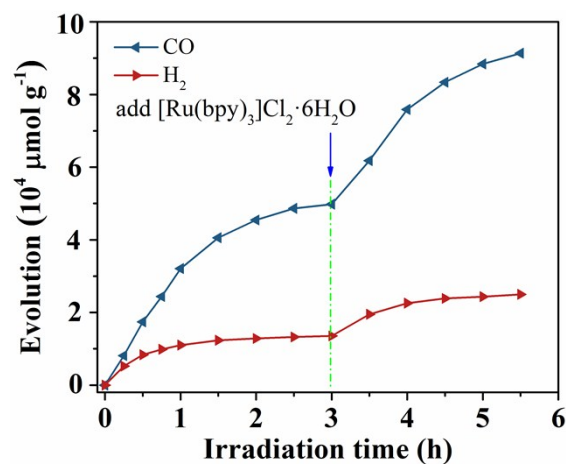

**Fig. S8.** The curves of catalytic activity by adding photosensitizer after 3 h of illumination.

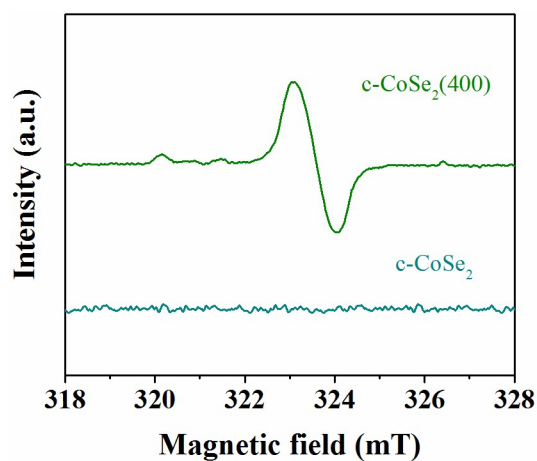

**Fig. S9.** ESR spectra of c-CoSe<sub>2</sub> and c-CoSe<sub>2</sub>(400). The c-CoSe<sub>2</sub>(400) shows an obvious ESR signal with g value of 2.0015, indicating the existence of Se vacancies.

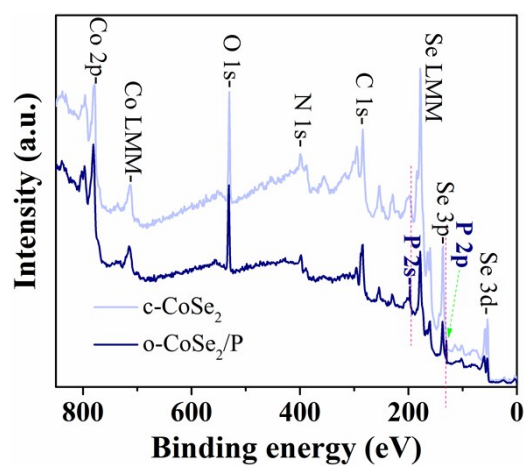

**Fig. S10.** XPS survey spectra of c-CoSe<sub>2</sub> and o-CoSe<sub>2</sub>/P.

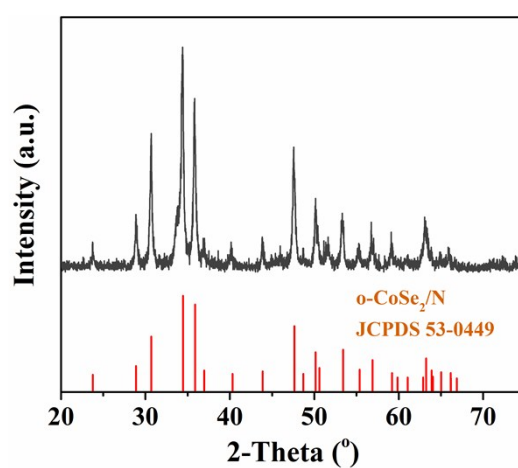

**Fig. S11.** XRD pattern of o-CoSe<sub>2</sub>/N after four recycles.

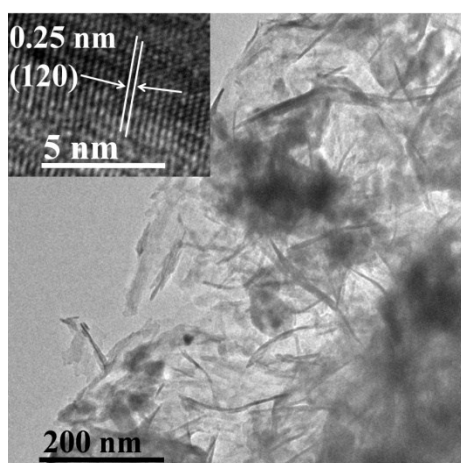

**Fig. S12.** TEM image of o-CoSe<sub>2</sub>/N after four recycles.

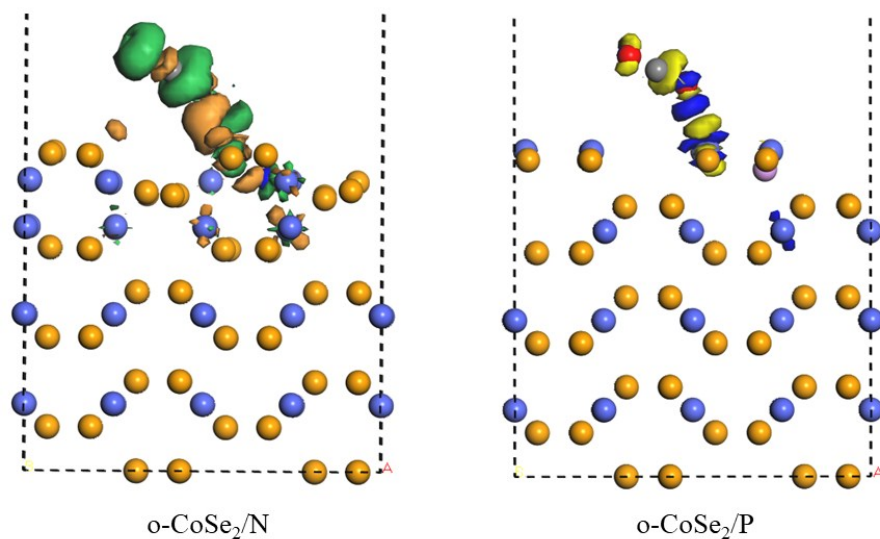

**Fig. S13.** Charge difference of CO<sub>2</sub> adsorbed on o-CoSe<sub>2</sub>/N and o-CoSe<sub>2</sub>/P.

**Table S1.** Control experiments of photocatalytic CO<sub>2</sub> reduction.

| Entry          | Catalyst/ o-CoSe <sub>2</sub> /N | Photosensitizer/ [Ru(bpy) <sub>3</sub> ]Cl <sub>2</sub> | CO <sub>2</sub> | TEOA | Light | Yield of CO (μmol) | Yield of H <sub>2</sub> (μmol) |
|----------------|----------------------------------|---------------------------------------------------------|-----------------|------|-------|--------------------|--------------------------------|
| 1              | ×                                | √                                                       | √               | √    | √     | 0                  | 1.6                            |
| 2              | √                                | ×                                                       | √               | √    | √     | 0                  | 0                              |
| 3 <sup>a</sup> | √                                | √                                                       | ×               | √    | √     | 0                  | 14.4                           |
| 4              | √                                | √                                                       | √               | ×    | √     | 0                  | 0                              |
| 5              | √                                | √                                                       | √               | √    | ×     | 0                  | 0.1                            |
| 6              | √                                | √                                                       | √               | √    | √     | 49.8               | 13.5                           |

Conditions: o-CoSe<sub>2</sub>/N (1 mg), [Ru(bpy)<sub>3</sub>]Cl<sub>2</sub> (5 mg), acetonitrile/H<sub>2</sub>O/TEOA = 4 mL

: 1 mL : 1.5 mL in the quartz tube of 55 mL, CO<sub>2</sub> (1 atm), irradiation with white LEDs

lamp at room temperature. <sup>a</sup>Degassed with argon.

**Table S2.** The comparisons of photocatalytic CO<sub>2</sub> reduction performance of o-CoSe<sub>2</sub> and other Co-based catalyst.

| Entry | Catalyst                             | average rate of CO ( $\mu\text{mol h}^{-1} \text{g}^{-1}$ ) |    |        | Reference             |
|-------|--------------------------------------|-------------------------------------------------------------|----|--------|-----------------------|
|       |                                      | 1h                                                          | 2h | 3h     |                       |
| 1     | o-CoSe <sub>2</sub> /N               | 32,000                                                      |    | 16,600 | This work             |
| 2     | o-CoSe <sub>2</sub> /P               |                                                             |    | 10,476 | This work             |
| 3     | o-CoSe <sub>2</sub> (pure phase)     |                                                             |    | 8,806  | This work             |
| 4     | c-CoSe <sub>2</sub>                  | 13,668                                                      |    | 8,402  | This work             |
| 5     | Co-Co <sub>2</sub> P@NPC             | 63,000                                                      |    | 35,000 | Our previous work [1] |
| 6     | Co <sub>1.11</sub> Te <sub>2</sub> C | 23,000                                                      |    | 11,400 | Our previous work [2] |
| 7     | Zn/Co-C-BMZIF (3:1)                  |                                                             |    | 11,000 | Ref. [4]              |
| 8     | CoSn(OH) <sub>6</sub>                | 18,700                                                      |    |        | [3]                   |
| 9     | Co <sub>3</sub> O <sub>4</sub> -NS   | 9,040 $\mu\text{mol h}^{-1} \text{g}^{-1}$ in 6 h           |    |        | [4]                   |
| 10    | Co <sub>3</sub> O <sub>4</sub>       | 3,523                                                       |    | 2,003  | Ref. [12]             |
| 11    | PMMCoCC-1200                         | 187 $\mu\text{mol h}^{-1} \text{g}^{-1}$ in 6 h             |    |        | [5]                   |
| 12    | ZnCo <sub>2</sub> O <sub>4</sub>     |                                                             |    | 45     | Ref. [9]              |
| 13    | CuCo <sub>2</sub> O <sub>4</sub>     | 22.9                                                        |    |        | [6]                   |
| 14    | Co-POM                               | 17 $\mu\text{mol h}^{-1} \text{g}^{-1}$ in 7 h              |    |        | [7]                   |
| 15    | Co <sub>6</sub> -MOF                 |                                                             |    | 13.1   | [8]                   |

- [1] Y. Xu, J. Mo, Z. Fu, S. Liu, Z. Yang and W. Fu, *Chem. Eur. J.*, 2018, **24**, 8596–8602.
- [2] Y. Xu, J. Mo, G. Xie, D. Ding, S. Ding, X. Wang and C. Li, *Chem. Commun.*, 2019, **55**, 6862–6865.
- [3] X. Lin, Y. Gao, M. Jiang, Y. Zhang, Y. Hou, W. Dai, S. Wang and Z. Ding, *Appl. Catal. B: Environ.*, 2018, **224**, 1009–1016.
- [4] W. Chen, B. Han, C. Tian, X. Liu, S. Liang, H. Deng and Z. Lin, *Appl. Catal. B: Environ.*, 2019, **244**, 996–1003.
- [5] K. Zhao, S. Zhao, C. Gao, J. Qi, H. Yin, D. Wei, M. F. Mideksa, X. Wang, Y. Gao, Z. Tang and R. Yu, *Small*, 2018, **14**, 1800762.
- [6] M. Jiang, Y. Gao, Z. Wang and Z. Ding, *Appl. Catal. B: Environ.*, 2016, **198**, 180–188.
- [7] G. Zhao, H. Pang, G. Liu, P. Li, H. Liu, H. Zhang, L. Shi and J. Ye, *Appl. Catal. B: Environ.*, 2017, **200**, 141–149.

- [8] J. Zhao, Q. Wang, C. Sun, T. Zheng, L. Yan, M. Li, K. Shao, X. Wang and Z. Su, *J. Mater. Chem. A*, 2017, **5**, 12498–12505.
